# Supplementary material for: Whole-Exome Screening and Analysis of Signaling Pathways in Multiple Endocrine Neoplasia Type 1 Patients with Different Outcomes: Insights into Cellular Mechanisms and Possible Functional Implications
Source: MDPI journal article supplement (doi:10.3390/ijms25021065), 2024-01-15
Supplement: s1 [file s1]

**Supplementary Table S1.** Pathways shared between all patient groups in the MEN1 pituitary analysis. P-values for the pathway in each group are stated. Genes with non-neutral variants for each patient group are listed. Genes that repeatedly contributed to the identification of pathways are mentioned on a shaded background. In brackets, the frequencies of variant alleles [GnomAD, non-Finnish European population] identified in the genes are presented.

| Pathway - identifier                                                |                         |                                          |                          |
|---------------------------------------------------------------------|-------------------------|------------------------------------------|--------------------------|
|                                                                     | Family A                | Patient X5                               | Patient X15              |
| Alzheimer's disease - WP5124                                        |                         |                                          |                          |
|                                                                     | P=0.0335                | P=0.0671                                 | P=0.1524                 |
|                                                                     | <i>KIF5C</i> (0.0018)   | <i>APOE</i> (0.0767)                     | <i>CACNA1F</i> (0.0247)  |
|                                                                     | <i>LRP1</i> (unknown)   | <i>ATP2A3</i> (0.0020)                   | <i>CACNA1S</i> (0.1294)  |
|                                                                     |                         | <i>LRP5</i> (0.0522)                     |                          |
|                                                                     |                         | <i>CACNA1S</i> (0.1294, 3.52E-5, 0.0502) |                          |
| Brain-Derived Neurotrophic Factor (BDNF) signaling pathway - WP2380 |                         |                                          |                          |
|                                                                     | P=0.1453                | P=0.2016                                 | P=0.5212                 |
|                                                                     | <i>NGF</i> (5.74E-4)    | <i>ACACB</i> (0.0631)                    | <i>DLG1</i> (0.0514)     |
| Burn wound healing - WP5055                                         |                         |                                          |                          |
|                                                                     | P=1.97E-4               | P=0.0219                                 | P=0.0159                 |
|                                                                     | <i>COL1A1</i> (5.06E-3) | <i>FN1</i> (4.34E-3)                     | <i>FN1</i> (3.10E-5)     |
|                                                                     | <i>MMP1</i> (3.88E-5)   |                                          | <i>TNC</i> (2.56E-3)     |
| Ciliary landscape - WP4352                                          |                         |                                          |                          |
|                                                                     | P=0.2057                | P=0.3434                                 | P=0.0232                 |
|                                                                     | <i>USH1C</i> (0.000*)   | <i>CDH23</i> (6.41E-4)                   | <i>EXOC2</i> (0.1016)    |
|                                                                     |                         |                                          | <i>LZTFL1</i> (0.0830)   |
| *detected only in the Latino/Admixed American population            |                         |                                          |                          |
| Development of ureteric collection system - WP5053                  |                         |                                          |                          |
|                                                                     | P=0.0622                | P=2.36E-5                                | P=1.31E-5                |
|                                                                     | <i>FREM2</i> (0.0499)   | <i>FRAS1</i> (0.0201)                    | <i>BMPRI1A</i> (8.79E-6) |
|                                                                     |                         | <i>FREM1</i> (0.2456)                    | <i>FREM1</i> (0.2456)    |
|                                                                     |                         | <i>GPC3</i> (unknown)                    | <i>GLI3</i> (0.0502)     |
|                                                                     |                         | <i>PBX1</i> (0.2192)                     | <i>PBX1</i> (0.2192)     |
| DNA IR-damage and cellular response via ATR - WP4016                |                         |                                          |                          |
|                                                                     | P=0.0845                | P=0.3740                                 | P=0.0644                 |
|                                                                     | <i>FANCI</i> (1.08E-3)  | <i>FANCA</i> (3.88E-3)                   | <i>FANCI</i> (0.0833)    |
|                                                                     |                         |                                          | <i>HERC2</i> (5.06E-3)   |
| DNA repair pathways, full network - WP4946                          |                         |                                          |                          |
|                                                                     | P=0.1207                | P=0.0311                                 | P=0.1217                 |
|                                                                     | <i>FANCI</i> (1.08E-3)  | <i>FANCA</i> (3.88E-3)                   | <i>FANCI</i> (0.0833)    |
|                                                                     |                         | <i>PARP2</i> (0.0247)                    | <i>POLL</i> (0.2233)     |
|                                                                     |                         | <i>POLE</i> (0.0144)                     |                          |
| Focal Adhesion - WP306                                              |                         |                                          |                          |

|                                                                          |                         |                              |                        |  |
|--------------------------------------------------------------------------|-------------------------|------------------------------|------------------------|--|
|                                                                          | P=0.1934                | P=2.06E-5                    | P=8.46E-6              |  |
|                                                                          | <i>COL1A1</i> (5.06E-3) | <i>FLNB</i> (0.2467, 0.2472) | <i>COL4A4</i> (0.4798) |  |
|                                                                          |                         | <i>FN1</i> (4.34E-3)         | <i>FN1</i> (3.10E-5)   |  |
|                                                                          |                         | <i>LAMC2</i> (0.0868)        | <i>LAMA1</i> (6.25E-3) |  |
|                                                                          |                         | <i>MET</i> (0.0118)          | <i>LAMC2</i> (0.0868)  |  |
|                                                                          |                         | <i>THBS1</i> (8.28E-4)       | <i>MET</i> (0.0118)    |  |
|                                                                          |                         | <i>TLN2</i> (4.12E-3)        | <i>RELN</i> (0.0160)   |  |
|                                                                          |                         |                              | <i>TNC</i> (2.56E-3)   |  |
| Focal Adhesion-PI3K-Akt-mTOR-signaling pathway - WP3932                  |                         |                              |                        |  |
|                                                                          | P=0.0420                | P=3.70E-4                    | P=4.53E-7              |  |
|                                                                          | <i>COL1A1</i> (5.06E-3) | <i>FN1</i> (4.34E-3)         | <i>COL4A4</i> (0.4798) |  |
|                                                                          | <i>NGF</i> (5.74E-4)    | <i>LAMC2</i> (0.0868)        | <i>FN1</i> (3.10E-5)   |  |
|                                                                          |                         | <i>MET</i> (0.0118)          | <i>HIF1A</i> (0.1049)  |  |
|                                                                          |                         | <i>TBC1D1</i> (0.0133)       | <i>LAMA1</i> (6.25E-3) |  |
|                                                                          |                         | <i>THBS1</i> (8.28E-4)       | <i>LAMC2</i> (0.0868)  |  |
|                                                                          |                         |                              | <i>MET</i> (0.0118)    |  |
|                                                                          |                         |                              | <i>RELN</i> (0.0160)   |  |
|                                                                          |                         |                              | <i>TNC</i> (2.56E-3)   |  |
| Hepatitis C and Hepatocellular Carcinoma - WP3646                        |                         |                              |                        |  |
|                                                                          | P=0.0530                | P=0.2510                     | P=0.2254               |  |
|                                                                          | <i>MMP1</i> (3.88E-5)   | <i>CXCR1</i> (7.38E-4)       | <i>HIF1A</i> (0.1049)  |  |
| Hypothesized Pathways in Pathogenesis of Cardiovascular Disease - WP3668 |                         |                              |                        |  |
|                                                                          | P=0.0269                | P=0.1345                     | P=0.1199               |  |
|                                                                          | <i>LTBP1</i> (0.0184)   | <i>FBN2</i> (1.68E-3)        | <i>FBN2</i> (3.15E-3)  |  |
| IL-18 signaling pathway - WP4754                                         |                         |                              |                        |  |
|                                                                          | P=0.0033                | P=0.0217                     | P=0.4074               |  |
|                                                                          | <i>COL1A1</i> (5.06E-3) | <i>ACACB</i> (0.0631)        | <i>FN1</i> (3.10E-5)   |  |
|                                                                          | <i>MMP1</i> (3.88E-5)   | <i>ACADS</i> (0.0442)        |                        |  |
|                                                                          | <i>PTPRZ1</i> (6.48E-5) | <i>FN1</i> (4.34E-3)         |                        |  |
|                                                                          |                         | <i>HADH</i> (8.16E-3)        |                        |  |
| Inflammatory Response Pathway - WP453                                    |                         |                              |                        |  |
|                                                                          | P=0.0332                | P=2.99E-5                    | P=5.27E-4              |  |
|                                                                          | <i>COL1A1</i> (5.06E-3) | <i>FN1</i> (4.34E-3)         | <i>FN1</i> (3.10E-5)   |  |
|                                                                          |                         | <i>LAMC2</i> (0.0868)        | <i>LAMC2</i> (0.0868)  |  |
|                                                                          |                         | <i>THBS1</i> (8.28E-4)       |                        |  |
| Malignant_pleural_mesothelioma - WP5087                                  |                         |                              |                        |  |
|                                                                          | P=0.0765                | P=0.0032                     | P=1.94E-6              |  |
|                                                                          | <i>NGF</i> (5.74E-4)    | <i>COL4A3</i> (0.4822)       | <i>CDH20</i> (0.1372)  |  |
|                                                                          | <i>SOST</i> (1.40E-4)   | <i>EZH2</i> (0.0798)         | <i>COL4A3</i> (0.4822) |  |
|                                                                          |                         | <i>FN1</i> (4.34E-3)         | <i>COL4A4</i> (0.4798) |  |
|                                                                          |                         | <i>LAMC2</i> (0.0868)        | <i>FN1</i> (3.10E-5)   |  |
|                                                                          |                         | <i>LRP5</i> (0.0522)         | <i>HIF1A</i> (0.1049)  |  |

|                                                                 |                           |                                          |                         |
|-----------------------------------------------------------------|---------------------------|------------------------------------------|-------------------------|
|                                                                 |                           | <i>MET</i> (0.0118)                      | <i>LAMA1</i> (6.25E-3)  |
|                                                                 |                           | <i>SELE</i> (0.1051)                     | <i>LAMC2</i> (0.0868)   |
|                                                                 |                           |                                          | <i>MET</i> (0.0118)     |
|                                                                 |                           |                                          | <i>TERT</i> (0.0301)    |
| MAPK Signaling Pathway - WP382                                  |                           |                                          |                         |
|                                                                 | P=0.2364                  | P=0.1712                                 | P=0.3587                |
|                                                                 | <i>NGF</i> (5.74E-4)      | <i>CACNA1S</i> (0.1294, 3.52E-5, 0.0502) | <i>CACNA1F</i> (0.0247) |
|                                                                 |                           | <i>FLNB</i> (0.2467, 0.2472)             | <i>CACNA1S</i> (0.1294) |
|                                                                 |                           | <i>HSPA1L</i> (0.000*)                   |                         |
| *detected only in the Asian population                          |                           |                                          |                         |
| Metapathway biotransformation Phase I and II - WP702            |                           |                                          |                         |
|                                                                 | P=0.1836                  | P=1.36E-5                                | P=0.0154                |
|                                                                 | <i>CHST12</i> (8.94E-6)   | <i>CHST5</i> (0.2044)                    | <i>AKR7A2</i> (0.0915)  |
|                                                                 |                           | <i>CYP27A1</i> (0.0224)                  | <i>EPHX2</i> (0.0991)   |
|                                                                 |                           | <i>CYP2C18</i> (0.1461)                  | <i>FMO2</i> (0.0869)    |
|                                                                 |                           | <i>CYP4F2</i> (0.2866)                   | <i>GSTO2</i> (3.10E-4)  |
|                                                                 |                           | <i>EPHX2</i> (0.0991)                    |                         |
|                                                                 |                           | <i>FMO2</i> (0.0869)                     |                         |
|                                                                 |                           | <i>FMO5</i> (0.0109)                     |                         |
|                                                                 |                           | <i>MGST1</i> (1.64E-4)                   |                         |
| miR-509-3p alteration of YAP1/ECM axis - WP3967                 |                           |                                          |                         |
|                                                                 | P=0.0194                  | P=0.0988                                 | P=0.0878                |
|                                                                 | <i>COL1A1</i> (5.06E-3)   | <i>FN1</i> (4.34E-3)                     | <i>FN1</i> (3.10E-5)    |
| Nanoparticle-mediated activation of receptor signaling - WP2643 |                           |                                          |                         |
|                                                                 | P=0.0300                  | P=0.1494                                 | P=0.1333                |
|                                                                 | <i>COL1A1</i> (5.06E-3)   | <i>FN1</i> (4.34E-3)                     | <i>FN1</i> (3.10E-5)    |
| Nephrotic syndrome - WP4758                                     |                           |                                          |                         |
|                                                                 | P=0.0489                  | P=0.0290                                 | P=0.0231                |
|                                                                 | <i>ARHGAP24</i> (2.64E-5) | <i>COL4A3</i> (0.4822)                   | <i>COL4A3</i> (0.4822)  |
|                                                                 |                           | <i>CUBN</i> (0.0384)                     | <i>COL4A4</i> (0.4798)  |
| Neural Crest Differentiation - WP2064                           |                           |                                          |                         |
|                                                                 | P=0.1032                  | P=0.4392                                 | P=0.0925                |
|                                                                 | <i>GFAP</i> (8.34E-3)     | <i>GFAP</i> (0.0296)                     | <i>NOTCH3</i> (0.0168)  |
| Neuroinflammation and glutamatergic signaling - WP5083          |                           |                                          |                         |
|                                                                 | P=0.0102                  | P=0.1932                                 | P=0.0351                |
|                                                                 | <i>GFAP</i> (8.34E-3)     | <i>DLAT</i> (0.3569)                     | <i>SHMT1</i> (1.20E-3)  |
|                                                                 | <i>NGF</i> (5.74E-4)      | <i>GFAP</i> (0.0296)                     |                         |
| Pathways in clear cell renal cell carcinoma - WP4018            |                           |                                          |                         |
|                                                                 | P=0.0875                  | P=0.0847                                 | P=9.17E-4               |
|                                                                 | <i>GPI</i> (0.0215)       | <i>ACACB</i> (0.0631)                    | <i>HIF1A</i> (0.1049)   |

|                                                                     |                         |                         |                         |  |
|---------------------------------------------------------------------|-------------------------|-------------------------|-------------------------|--|
|                                                                     |                         | <i>ZEB1</i> (3.32E-3)   | <i>PGM1</i> (0.1898)    |  |
|                                                                     |                         |                         | <i>SHMT1</i> (1.20E-3)  |  |
| PI3K-Akt Signaling Pathway - WP4172                                 |                         |                         |                         |  |
|                                                                     | P=0.0518                | P=1.59E-4               | P=2.23E-8               |  |
|                                                                     | <i>COL1A1</i> (5.06E-3) | <i>COL4A3</i> (0.4822)  | <i>COL4A3</i> (0.4822)  |  |
|                                                                     | <i>NGF</i> (5.74E-4)    | <i>COL6A3</i> (0.0883)  | <i>COL4A4</i> (0.4798)  |  |
|                                                                     |                         | <i>FN1</i> (4.34E-3)    | <i>COL6A3</i> (0.0883)  |  |
|                                                                     |                         | <i>LAMC2</i> (0.0868)   | <i>COL9A2</i> (3.87E-3) |  |
|                                                                     |                         | <i>MET</i> (0.0118)     | <i>FN1</i> (3.10E-5)    |  |
|                                                                     |                         | <i>PCK1</i> (0.1216)    | <i>G6PC2</i> (8.59E-3)  |  |
|                                                                     |                         | <i>THBS1</i> (8.28E-4)  | <i>LAMA1</i> (6.25E-3)  |  |
|                                                                     |                         |                         | <i>LAMC2</i> (0.0868)   |  |
|                                                                     |                         |                         | <i>MET</i> (0.0118)     |  |
|                                                                     |                         |                         | <i>RELN</i> (0.0160)    |  |
|                                                                     |                         |                         | <i>TNC</i> (2.56E-3)    |  |
| PPAR signaling pathway - WP3942                                     |                         |                         |                         |  |
|                                                                     | P=0.0714                | P=0.0072                | P=0.2935                |  |
|                                                                     | <i>MMP1</i> (3.88E-5)   | <i>APOA5</i> (0.0637)   | <i>ACADL</i> (0.0307)   |  |
|                                                                     |                         | <i>CYP27A1</i> (0.0224) |                         |  |
|                                                                     |                         | <i>PCK1</i> (0.1216)    |                         |  |
| Prader-Willi and Angelman syndrome - WP3998                         |                         |                         |                         |  |
|                                                                     | P=0.0704                | P=0.0572                | P=0.0049                |  |
|                                                                     | <i>NGF</i> (5.74E-4)    | <i>CDC6</i> (0.0604)    | <i>HERC2</i> (5.06E-3)  |  |
|                                                                     |                         | <i>KISS1</i> (0.0379)   | <i>OCA2</i> (0.0650)    |  |
| Senescence and Autophagy in Cancer - WP615                          |                         |                         |                         |  |
|                                                                     | P=0.1101                | P=0.1268                | P=0.4214                |  |
|                                                                     | <i>COL1A1</i> (5.06E-3) | <i>FN1</i> (4.34E-3)    | <i>FN1</i> (3.10E-5)    |  |
|                                                                     |                         | <i>THBS1</i> (8.28E-4)  |                         |  |
| Statin inhibition of cholesterol production - WP430                 |                         |                         |                         |  |
|                                                                     | P=0.0311                | P=6.17E-4               | P=0.1377                |  |
|                                                                     | <i>LRP1</i> (unknown)   | <i>APOA5</i> (0.0637)   | <i>APOB</i> (0.2156)    |  |
|                                                                     |                         | <i>APOE</i> (0.0767)    |                         |  |
|                                                                     |                         | <i>LCAT</i> (0.0284)    |                         |  |
| Sudden Infant Death Syndrome (SIDS) Susceptibility Pathways - WP706 |                         |                         |                         |  |
|                                                                     | P=0.1656                | P=0.2481                | P=0.2074                |  |
|                                                                     | <i>NGF</i> (5.74E-4)    | <i>CHAT</i> (0.0650)    | <i>HIF1A</i> (0.1049)   |  |
|                                                                     |                         | <i>PBX1</i> (0.2192)    | <i>PBX1</i> (0.2192)    |  |
| TGF-beta Signaling Pathway - WP366                                  |                         |                         |                         |  |
|                                                                     | P=0.1340                | P=0.0073                | P=0.0048                |  |
|                                                                     | <i>MMP1</i> (3.88E-5)   | <i>FN1</i> (4.34E-3)    | <i>FN1</i> (3.10E-5)    |  |
|                                                                     |                         | <i>MET</i> (0.0118)     | <i>MET</i> (0.0118)     |  |
|                                                                     |                         | <i>THBS1</i> (8.28E-4)  | <i>TERT</i> (0.0301)    |  |
|                                                                     |                         | <i>ZEB1</i> (3.32E-3)   | <i>TNC</i> (2.56E-3)    |  |

| VEGFA-VEGFR2 signaling pathway - WP3888 |               |           |                 |                     |
|-----------------------------------------|---------------|-----------|-----------------|---------------------|
|                                         | P=0.3781      |           | P=0.1072        |                     |
|                                         | <i>PTPRZ1</i> | (6.48E-5) | <i>ACACB</i>    | (0.0631)            |
|                                         |               |           | <i>FLNB</i>     | (0.2467,<br>0.2472) |
|                                         |               |           | <i>FN1</i>      | (4.34E-3)           |
|                                         |               |           | <i>SELE</i>     | (0.1051)            |
|                                         | P=0.1814      |           | <i>FN1</i>      | (3.10E-5)           |
|                                         |               |           | <i>TKT</i>      | (7.45E-3)           |
|                                         |               |           | <i>TRAF3IP2</i> | (1.22E-3)           |
|                                         |               |           |                 |                     |

**Supplementary Table S2.** Pathways shared between all patient groups in the MEN1 adrenal analysis. P-values for the pathway in each group are stated. Genes with non-neutral variants for each patient group are listed. Genes that repeatedly contributed to the identification of pathways are mentioned on a shaded background. In brackets, the frequencies of variant alleles [GnomAD, non-Finnish European population] identified in the genes are presented.

| Pathway – identifier                                                       |                         |                          |                               |                         |
|----------------------------------------------------------------------------|-------------------------|--------------------------|-------------------------------|-------------------------|
|                                                                            | Family A                | Family C                 | Patient X11                   | Patient X15             |
| Selenium micronutrient network - WP15                                      |                         |                          |                               |                         |
|                                                                            | P= 0.1513               | P= 0.1657                | P= 0.3389                     | P= 0.3188               |
|                                                                            | <i>APOB</i> (0.0350)    | <i>SELP</i> (0.000*)     | <i>TXNRD2</i> (0.3430)        | <i>TXNRD2</i> (0.3430)  |
|                                                                            |                         | <i>TXNRD2</i> (0.3430)   |                               |                         |
| * identified only in the African/African American population               |                         |                          |                               |                         |
| MicroRNAs in cardiomyocyte hypertrophy - WP1544                            |                         |                          |                               |                         |
|                                                                            | P= 0.1594               | P= 0.1744                | P= 0.0097                     | P= 0.3339               |
|                                                                            | <i>NRG1</i> (2.32E-5)   | <i>NRG1</i> (0.0441)     | <i>FZD1</i> (1.30E-4)         | <i>NRG1</i> (0.0208)    |
| Neural crest differentiation - WP2064                                      |                         |                          |                               |                         |
|                                                                            | P= 0.0157               | P= 0.1899                | P= 0.3821                     | P= 0.0735               |
|                                                                            | <i>MPZ</i> (0.0316)     | <i>COL11A2</i> (1.09E-4) | <i>TCF7L1</i> (0.0595)        | <i>NOTCH3</i> (0.0168)  |
|                                                                            | <i>NOTCH3</i> (6.62E-5) |                          |                               |                         |
| Arrhythmogenic right ventricular cardiomyopathy - WP2118                   |                         |                          |                               |                         |
|                                                                            | P= 0.0088               | P= 0.1443                | P=4.54E-4                     | P= 0.0045               |
|                                                                            | <i>CACNB2</i> (0.1800)  | <i>DSP</i> (1.77E-3)     | <i>ACTN2</i> (8.21E-4)        | <i>ACTN2</i> (3.26E-4)  |
|                                                                            | <i>ITGB4</i> (2.25E-4)  |                          | <i>CACNA1S</i> (8.79E-6)      | <i>CACNA1F</i> (0.0247) |
|                                                                            |                         |                          | <i>SGCG</i> (0.1305)          | <i>SGCG</i> (0.1305)    |
|                                                                            |                         |                          | <i>TCF7L1</i> (0.0595)        |                         |
| Primary focal segmental glomerulosclerosis FSGS - WP2572                   |                         |                          |                               |                         |
|                                                                            | P= 0.0084               | P= 0.1407                | P= 0.0051                     | P= 0.0411               |
|                                                                            | <i>DNM1</i> (4.86E-3)   | <i>COL4A4</i> (0.0367)   | <i>CR1</i> (0.0282)           | <i>AGRN</i> (2.05E-3)   |
|                                                                            | <i>ITGB4</i> (2.25E-4)  |                          | <i>JAG1</i> (0.0673)          | <i>COL4A4</i> (0.4798)  |
|                                                                            |                         |                          | <i>LAMA5</i> (0.0186, 0.0904) |                         |
| Cardiac Hypertrophic Response - WP2795                                     |                         |                          |                               |                         |
|                                                                            | P= 0.0978               | P= 0.1075                | P= 0.2288                     | P= 0.2142               |
|                                                                            | <i>NRG1</i> (2.32E-5)   | <i>NRG1</i> (0.0441)     | <i>CDK7</i> (0.0245)          | <i>NRG1</i> (0.0208)    |
| Ectoderm differentiation - WP2858                                          |                         |                          |                               |                         |
|                                                                            | P= 0.0290               | P= 0.2539                | P= 0.4880                     | P= 0.0035               |
|                                                                            | <i>SIX6</i> (4.88E-3)   | <i>PTPRB</i> (unknown)   | <i>TCF7L1</i> (0.0595)        | <i>BMPR1A</i> (8.79E-6) |
|                                                                            |                         |                          |                               | <i>EDA2R</i> (8.99E-3)  |
|                                                                            |                         |                          |                               | <i>GLI3</i> (0.0502)    |
|                                                                            |                         |                          |                               | <i>ZFHX4</i> (7.37E-3)  |
| Apoptosis-related network due to altered Notch3 in ovarian cancer - WP2864 |                         |                          |                               |                         |
|                                                                            | P= 0.0961               | P= 0.1056                | P= 0.0021                     | P= 0.0234               |

|                                                      |                        |                         |                               |                        |
|------------------------------------------------------|------------------------|-------------------------|-------------------------------|------------------------|
|                                                      | <i>NRG1</i> (2.32E-5)  | <i>NRG1</i> (0.0441)    | <i>ABL1</i> (7.61E-3)         | <i>NRG1</i> (0.0208)   |
|                                                      |                        |                         | <i>NQO1</i> (0.1886)          |                        |
|                                                      |                        |                         | <i>TNFRSF10B</i> (0.0706)     |                        |
| Vitamin D Receptor Pathway - WP2877                  |                        |                         |                               |                        |
|                                                      | P= 0.2963              | P= 0.3216               | P= 0.0592                     | P= 0.1977              |
|                                                      | <i>STEAP4</i> (0.1942) | <i>KNG1</i> (0.1109)    | <i>KL</i> (0.1526)            | <i>HIF1A</i> (0.1049)  |
|                                                      |                        |                         | <i>NOX1</i> (0.0272)          | <i>KNG1</i> (0.1109)   |
|                                                      |                        |                         | <i>STEAP4</i> (0.1942)        |                        |
| NRF2 pathway - WP2884                                |                        |                         |                               |                        |
|                                                      | P= 0.0294              | P= 0.0352               | P= 0.0047                     | P= 0.4650              |
|                                                      | <i>EPHA3</i> (1.87E-3) | <i>NRG1</i> (0.0441)    | <i>NQO1</i> (0.1886)          | <i>NRG1</i> (0.0208)   |
|                                                      | <i>NRG1</i> (2.32E-5)  | <i>SLC5A2</i> (1.55E-5) | <i>SLC2A6</i> (0.0872)        |                        |
|                                                      |                        |                         | <i>SLC39A13</i> (3.65E-3)     |                        |
|                                                      |                        |                         | <i>SLC39A4</i> (1.50E-3)      |                        |
| miRNA targets in ECM and membrane receptors - WP2911 |                        |                         |                               |                        |
|                                                      | P= 0.0592              | P= 0.0021               | P= 0.1427                     | P= 0.1331              |
|                                                      | <i>LAMA4</i> (0.0645)  | <i>COL5A1</i> (1.04E-3) | <i>COL5A1</i> (0.0468)        | <i>FN1</i> (3.10E-5)   |
|                                                      |                        | <i>COL6A2</i> (3.15E-5) |                               |                        |
| Focal adhesion - WP306                               |                        |                         |                               |                        |
|                                                      | P= 5.59E-4             | P= 0.0084               | P= 0.0153                     | P= 2.66E-4             |
|                                                      | <i>ITGB4</i> (2.25E-4) | <i>COL4A4</i> (0.0367)  | <i>FLNA</i> (3.97E-3)         | <i>COL4A4</i> (0.4798) |
|                                                      | <i>LAMA4</i> (0.0645)  | <i>COL6A2</i> (3.15E-5) | <i>FLNC</i> (9.68E-3)         | <i>FN1</i> (3.10E-5)   |
|                                                      | <i>THBS4</i> (0.2203)  | <i>TNC</i> (7.08E-3)    | <i>LAMA5</i> (0.0186, 0.0904) | <i>LAMA1</i> (0.0101)  |
|                                                      |                        |                         | <i>RELN</i> (0.0158)          | <i>RELN</i> (0.0160)   |
|                                                      |                        |                         |                               | <i>TNC</i> (2.56E-3)   |
| TGF-beta signaling pathway - WP366                   |                        |                         |                               |                        |
|                                                      | P= 0.2227              | P= 0.0316               | P= 0.4704                     | P= 0.0029              |
|                                                      | <i>ITGB4</i> (2.25E-4) | <i>TGIF1</i> (0.0568)   | <i>TRAP1</i> (0.1837)         | <i>FN1</i> (3.10E-5)   |
|                                                      |                        | <i>TNC</i> (7.08E-3)    |                               | <i>TERT</i> (0.0301)   |
|                                                      |                        |                         |                               | <i>TNC</i> (2.56E-3)   |
|                                                      |                        |                         |                               | <i>TRAP1</i> (0.1837)  |
| Striated muscle contraction - WP383                  |                        |                         |                               |                        |
|                                                      | P= 0.0699              | P= 0.0769               | P= 0.0144                     | P= 6.52E-4             |
|                                                      | <i>NEB</i> (3.59E-4)   | <i>MYBPC1</i> (0.1563)  | <i>ACTN2</i> (8.21E-4)        | <i>ACTN2</i> (3.26E-4) |
|                                                      |                        |                         | <i>TTN</i> (4.96E-5)          | <i>NEB</i> (0.3281)    |
|                                                      |                        |                         |                               | <i>TTN</i> (0.3075)    |
| MYD88 distinct input-output pathway - WP3877         |                        |                         |                               |                        |
|                                                      | P= 0.0337              | P= 0.0372               | P= 0.0829                     | P= 0.0772              |
|                                                      | <i>TLR10</i> (0.3691)  | <i>TLR10</i> (0.3691)   | <i>TLR10</i> (0.3691)         | <i>TLR10</i> (0.3691)  |
| VEGFA-VEGFR2 signaling pathway - WP3888              |                        |                         |                               |                        |
|                                                      | P= 0.2002              | P= 0.2317               | P= 0.0052                     | P= 0.3046              |

|                                                         |                                |                          |                               |                           |
|---------------------------------------------------------|--------------------------------|--------------------------|-------------------------------|---------------------------|
|                                                         | <i>ACACB</i> (0.1943)          | <i>TRAF3IP2</i> (0.0740) | <i>ABL1</i> (7.61E-3)         | <i>FN1</i> (3.10E-5)      |
|                                                         | <i>EPB41</i> (0.0492, 7.66E-3) |                          | <i>BIN1</i> (0.0156)          | <i>TKT</i> (7.45E-3)      |
|                                                         |                                |                          | <i>JAG1</i> (0.0673)          | <i>TRAF3IP2</i> (1.22E-3) |
|                                                         |                                |                          | <i>KL</i> (0.1526)            |                           |
|                                                         |                                |                          | <i>NCF2</i> (0.0487)          |                           |
|                                                         |                                |                          | <i>SCUBE2</i> (0.0777)        |                           |
|                                                         |                                |                          | <i>TKT</i> (1.19E-3)          |                           |
| Amino acid metabolism - WP3925                          |                                |                          |                               |                           |
|                                                         | P= 0.1594                      | P= 0.1744                | P= 0.3547                     | P= 0.0623                 |
|                                                         | <i>HDC</i> (0.0273)            | <i>IDH1</i> (0.0136)     | <i>FAH</i> (0.0234)           | <i>G6PC2</i> (8.59E-3)    |
|                                                         |                                |                          |                               | <i>HDC</i> (0.0273)       |
| Focal adhesion-PI3K-Akt-mTOR-signaling pathway - WP3932 |                                |                          |                               |                           |
|                                                         | P= 2.37E-5                     | P= 4.32E-4               | P= 0.0150                     | P= 6.32E-5                |
|                                                         | <i>HSP90B1</i> (0.0176)        | <i>COL11A2</i> (1.09E-4) | <i>COL5A1</i> (0.0468)        | <i>COL4A4</i> (0.4798)    |
|                                                         | <i>ITGAE</i> (0.0533)          | <i>COL4A4</i> (0.0367)   | <i>LAMA5</i> (0.0186, 0.0904) | <i>FN1</i> (3.10E-5)      |
|                                                         | <i>ITGB4</i> (2.25E-4)         | <i>COL5A1</i> (1.04E-3)  | <i>NGF</i> (0.0172)           | <i>HIF1A</i> (0.1049)     |
|                                                         | <i>LAMA4</i> (0.0645)          | <i>COL6A2</i> (3.15E-5)  | <i>RELN</i> (0.0158)          | <i>LAMA1</i> (0.0101)     |
|                                                         | <i>THBS4</i> (0.2203)          | <i>TNC</i> (7.08E-3)     |                               | <i>RELN</i> (0.0160)      |
|                                                         |                                |                          |                               | <i>TNC</i> (2.56E-3)      |
| TYROBP Causal Network - WP3945                          |                                |                          |                               |                           |
|                                                         | P= 0.1081                      | P= 0.0071                | P= 0.2507                     | P= 0.2349                 |
|                                                         | <i>TCIRG1</i> (0.0616)         | <i>TCIRG1</i> (1.71E-4)  | <i>NCF2</i> (0.0487)          | <i>DPYD</i> (0.1018)      |
| PI3K-Akt signaling pathway - WP4172                     |                                |                          |                               |                           |
|                                                         | P= 4.65E-4                     | P= 0.0056                | P= 0.0235                     | P= 2.18E-5                |
|                                                         | <i>HSP90B1</i> (0.0176)        | <i>COL4A4</i> (0.0367)   | <i>LAMA5</i> (0.0186, 0.0904) | <i>COL4A4</i> (0.4798)    |
|                                                         | <i>ITGB4</i> (2.25E-4)         | <i>COL6A2</i> (3.15E-5)  | <i>NGF</i> (0.0172)           | <i>COL9A2</i> (3.87E-3)   |
|                                                         | <i>LAMA4</i> (0.0645)          | <i>TNC</i> (7.08E-3)     | <i>RELN</i> (0.0158)          | <i>FN1</i> (3.10E-5)      |
|                                                         | <i>THBS4</i> (0.2203)          |                          |                               | <i>G6PC2</i> (8.59E-3)    |
|                                                         |                                |                          |                               | <i>LAMA1</i> (0.0101)     |
|                                                         |                                |                          |                               | <i>RELN</i> (0.0160)      |
|                                                         |                                |                          |                               | <i>TNC</i> (2.56E-3)      |
| EMT in colorectal cancer - WP4239                       |                                |                          |                               |                           |
|                                                         | P= 0.2632                      | P= 0.0448                | P= 0.1792                     | P= 7.76E-4                |
|                                                         | <i>NOTCH3</i> (6.62E-5)        | <i>COL4A4</i> (0.0367)   | <i>FZD1</i> (1.30E-4)         | <i>CLDN20</i> (0.0154)    |
|                                                         |                                | <i>DSP</i> (1.77E-3)     | <i>JAG1</i> (0.0673)          | <i>COL4A4</i> (0.4798)    |
|                                                         |                                |                          |                               | <i>FN1</i> (3.10E-5)      |
|                                                         |                                |                          |                               | <i>HIF1A</i> (0.1049)     |
|                                                         |                                |                          |                               | <i>NOTCH3</i> (0.0168)    |
| Ciliary landscape - WP4352                              |                                |                          |                               |                           |
|                                                         | P= 0.3318                      | P= 0.3592                | P= 0.0036                     | P= 0.2417                 |
|                                                         | <i>CDH23</i> (0.1719)          | <i>BBS5</i> (1.49E-3)    | <i>APC</i> (5.45E-5)          | <i>CDH23</i> (0.2679)     |



|                                                              |                                      |                         |                                               |                         |
|--------------------------------------------------------------|--------------------------------------|-------------------------|-----------------------------------------------|-------------------------|
|                                                              |                                      |                         | <i>BBS5</i> (8.68E-3)                         | <i>EXOC2</i> (0.1016)   |
|                                                              |                                      |                         | <i>CDH23</i> (0.0279, 0.2679)                 |                         |
|                                                              |                                      |                         | <i>IFT122</i> (6.37E-3)                       |                         |
| GPCRs, Class A Rhodopsin-like - WP455                        |                                      |                         |                                               |                         |
|                                                              | P= 0.3928                            | P= 0.1046               | P= 0.1310                                     | P= 0.1113               |
|                                                              | <i>MTNR1A</i> (0.0145)               | <i>AVPR1A</i> (0.0126)  | <i>ADRA1A</i> (0.0105)                        | <i>HTR1B</i> (0.0136)   |
|                                                              |                                      |                         | <i>MC1R</i> (0.0718)                          | <i>MC1R</i> (0.0797)    |
|                                                              |                                      |                         |                                               | <i>MTNR1B</i> (1.44E-3) |
| Small cell lung cancer - WP4658                              |                                      |                         |                                               |                         |
|                                                              | P= 0.1658                            | P= 0.1813               | P= 0.3670                                     | P= 8.81E-4              |
|                                                              | <i>LAMA4</i> (0.0645)                | <i>COL4A4</i> (0.0367)  | <i>LAMA5</i> (0.0186, 0.0904)                 | <i>COL4A4</i> (0.4798)  |
|                                                              |                                      |                         |                                               | <i>FN1</i> (3.10E-5)    |
|                                                              |                                      |                         |                                               | <i>LAMA1</i> (0.0101)   |
| Male infertility - WP4673                                    |                                      |                         |                                               |                         |
|                                                              | P= 0.2374                            | P= 0.2586               | P= 0.0312                                     | P= 0.1320               |
|                                                              | <i>APOB</i> (0.0350)                 | <i>PEMT</i> (1.05E-3)   | <i>AHRR</i> (0.3994)                          | <i>AHRR</i> (0.3994)    |
|                                                              |                                      |                         | <i>AR</i> (2.48E-3)                           | <i>SHMT1</i> (1.20E-3)  |
|                                                              |                                      |                         | <i>NQO1</i> (0.1886)                          |                         |
| IL-18 signaling pathway - WP4754                             |                                      |                         |                                               |                         |
|                                                              | P= 0.0962                            | P= 0.4392               | P= 0.1452                                     | P= 0.7066               |
|                                                              | <i>ACACB</i> (0.1943)                | <i>TRPM7</i> (0.000*)   | <i>BIN1</i> (0.0156)                          | <i>FN1</i> (3.10E-5)    |
|                                                              | <i>EPB41</i> (0.0492, 7.66E-3)       |                         | <i>NCF2</i> (0.0487)                          |                         |
|                                                              |                                      |                         | <i>NOX1</i> (0.0272)                          |                         |
| * identified only in the African/African American population |                                      |                         |                                               |                         |
| Proximal tubule transport - WP4917                           |                                      |                         |                                               |                         |
|                                                              | P= 0.1013                            | P= 0.1112               | P= 0.2362                                     | P= 0.2211               |
|                                                              | <i>ATP6V1B</i> <sub>1</sub> (0.0232) | <i>SLC5A2</i> (1.55E-5) | <i>ATP6V0A</i> <sub>4</sub> (7.12E-3, 0.0457) | <i>SLC7A9</i> (0.3356)  |
| Malignant pleural mesothelioma - WP5087                      |                                      |                         |                                               |                         |
|                                                              | P= 0.1906                            | P= 0.5886               | P= 2.12E-4                                    | P= 0.0029               |
|                                                              | <i>ITGB4</i> (2.25E-4)               | <i>COL4A4</i> (0.0367)  | <i>APC</i> (5.45E-5)                          | <i>COL4A4</i> (0.4798)  |
|                                                              | <i>LAMA4</i> (0.0645)                |                         | <i>CDK7</i> (0.0245)                          | <i>FN1</i> (3.10E-5)    |
|                                                              |                                      |                         | <i>FZD1</i> (1.30E-4)                         | <i>HIF1A</i> (0.1049)   |
|                                                              |                                      |                         | <i>LAMA5</i> (0.0186, 0.0904)                 | <i>LAMA1</i> (0.0101)   |
|                                                              |                                      |                         | <i>NGF</i> (0.0172)                           | <i>TERT</i> (0.0301)    |
|                                                              |                                      |                         | <i>TCF7L1</i> (0.0595)                        |                         |
| ErbB Signaling Pathway - WP673                               |                                      |                         |                                               |                         |
|                                                              | P= 0.1578                            | P= 0.0155               | P= 0.3516                                     | P= 0.3309               |
|                                                              | <i>NRG1</i> (2.32E-5)                | <i>ERBB4</i> (unknown)  | <i>ABL1</i> (7.61E-3)                         | <i>NRG1</i> (0.0208)    |
|                                                              |                                      | <i>NRG1</i> (0.0441)    |                                               |                         |

| Sudden Infant Death Syndrome (SIDS) susceptibility pathways - WP706 |                         |                       |                       |                       |
|---------------------------------------------------------------------|-------------------------|-----------------------|-----------------------|-----------------------|
|                                                                     | P= 0.2716               | P= 0.0479             | P= 0.0013             | P= 0.5238             |
|                                                                     | <i>HSP90B1</i> (0.0176) | <i>NR3C1</i> (0.0266) | <i>AR</i> (2.48E-3)   | <i>HIF1A</i> (0.1049) |
|                                                                     |                         |                       | <i>MBD1</i> (0.2049)  |                       |
|                                                                     |                         |                       | <i>NGF</i> (0.0172)   |                       |
|                                                                     |                         |                       | <i>RET</i> (9.06E-4)  |                       |
|                                                                     |                         |                       | <i>TPH2</i> (1.48E-3) |                       |
